# Supplementary material for: Investigation of polymer-derived Si–(B)–C–N ceramic/reduced graphene oxide composite systems as active catalysts towards the hydrogen evolution reaction
Source: PubMed Central journal article supplement (PMC7738544; doi:10.1038/s41598-020-78558-x), 2020-12-15
Supplement: 41598_2020_78558_MOESM1_ESM.pdf [file 41598_2020_78558_MOESM1_ESM.pdf]

*Supplementary material for*

**Investigation of Polymer-Derived Si-(B)-C-N ceramic/reduced graphene oxide composite systems as active catalysts towards the hydrogen evolution reaction**

Quentin Hanniet<sup>1</sup>, Moustapha Boussmen<sup>1</sup>, Jonathan Barés<sup>2</sup>, Vincent Huon<sup>2</sup>, Igor Iatsunskyi<sup>3</sup>, Emerson Coy<sup>3</sup>, Mikhael Bechelany<sup>1</sup>, Christel Gervais<sup>4</sup>, Damien Voiry<sup>1</sup>, Philippe Miele<sup>1,5\*</sup>, Chrystelle Salameh<sup>1\*</sup>

Affiliations:

<sup>1</sup> *Institut Européen des Membranes, IEM, UMR 5635, Univ Montpellier, CNRS, ENSCM, 34095 Montpellier Cedex 5, France*

<sup>2</sup> *Laboratoire de Mécanique et Génie Civil, UMR 5508 CNRS-Université de Montpellier, 34090, Montpellier, France*

<sup>3</sup> *NanoBioMedical Centre, Adam Mickiewicz University, Wszechnicy Piastowskiej str. 3, 61-614 Poznan, Poland*

<sup>4</sup> *Sorbonne Université, UMR 7574 CNRS, Laboratoire de Chimie de la Matière Condensée de Paris, LCMCP, F-75005 Paris, France*

<sup>5</sup> *Institut Universitaire de France (IUF), MENESR, 1 rue Descartes, 75231 Paris Cedex 05, France*

Corresponding authors: [chrystelle.salameh@enscm.fr](mailto:chrystelle.salameh@enscm.fr) (Chrystelle Salameh)

[philippe.miele@umontpellier.fr](mailto:philippe.miele@umontpellier.fr) (Philippe Miele)

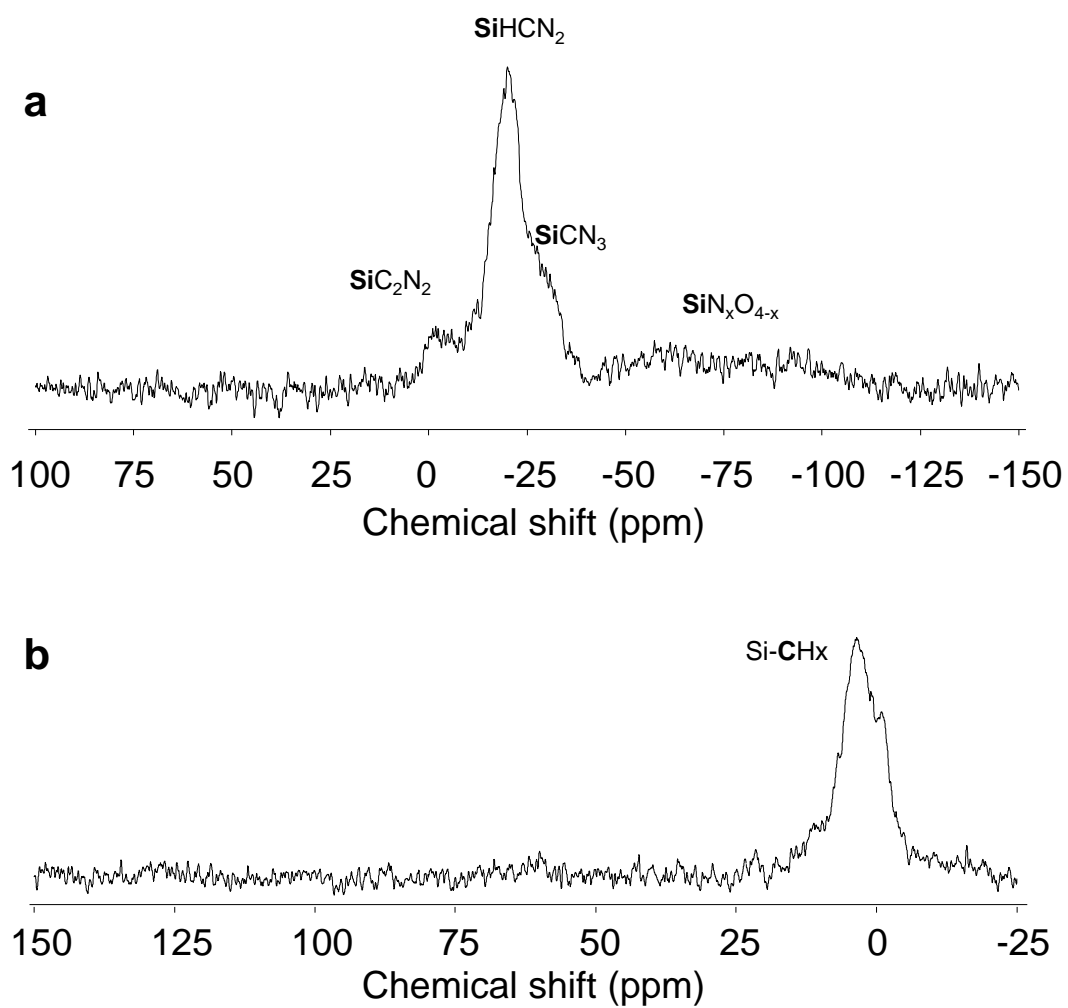

**Figure S1:** (a)  $^{29}\text{Si}$  MAS and (b)  $^{13}\text{C}$  CP MAS NMR spectra of O-PBVZ polymer.

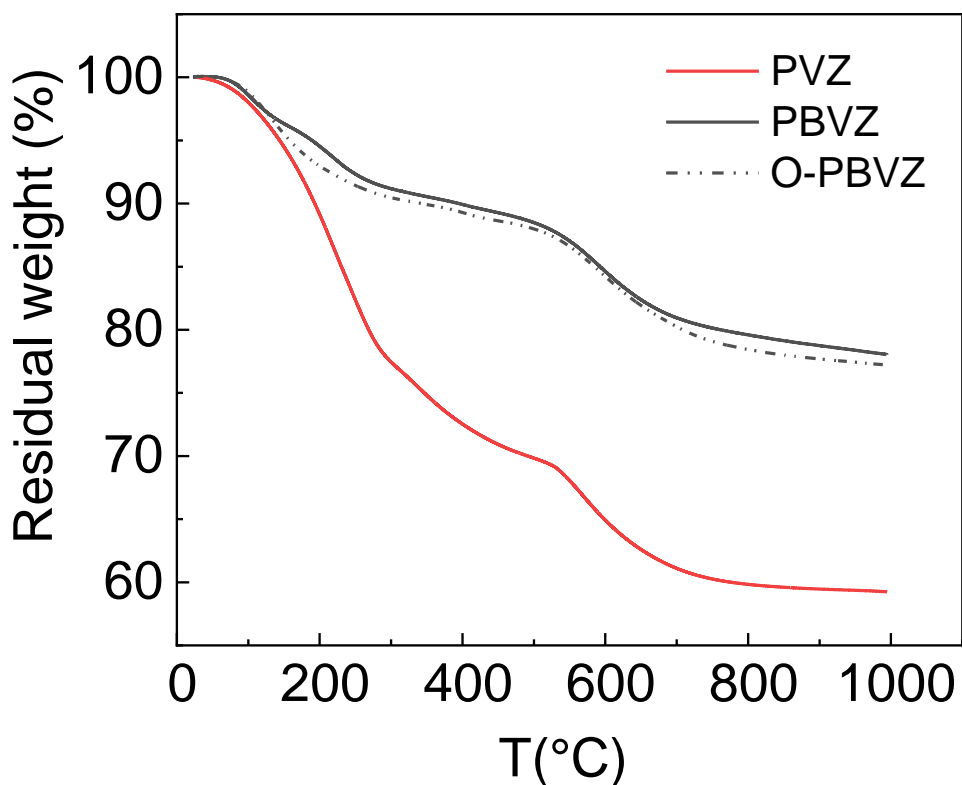

**Figure S2 :** TGA curves of PVZ, PBVZ and O-PBVZ polymers up to 1000°C under N<sub>2</sub> (heating rate 5°C.min<sup>-1</sup>). The polymer-to-ceramic transformation occurs through several distinctive stages, in particular, two weight losses are predominant: the first one from room temperature up to 300°C (~3 wt.%) and the second one from 300 up to 1000°C (~19 wt.%). They are associated to the decomposition of organic components accompanied by the release of gaseous compounds such as H<sub>2</sub> and CH<sub>4</sub> and other volatile species.

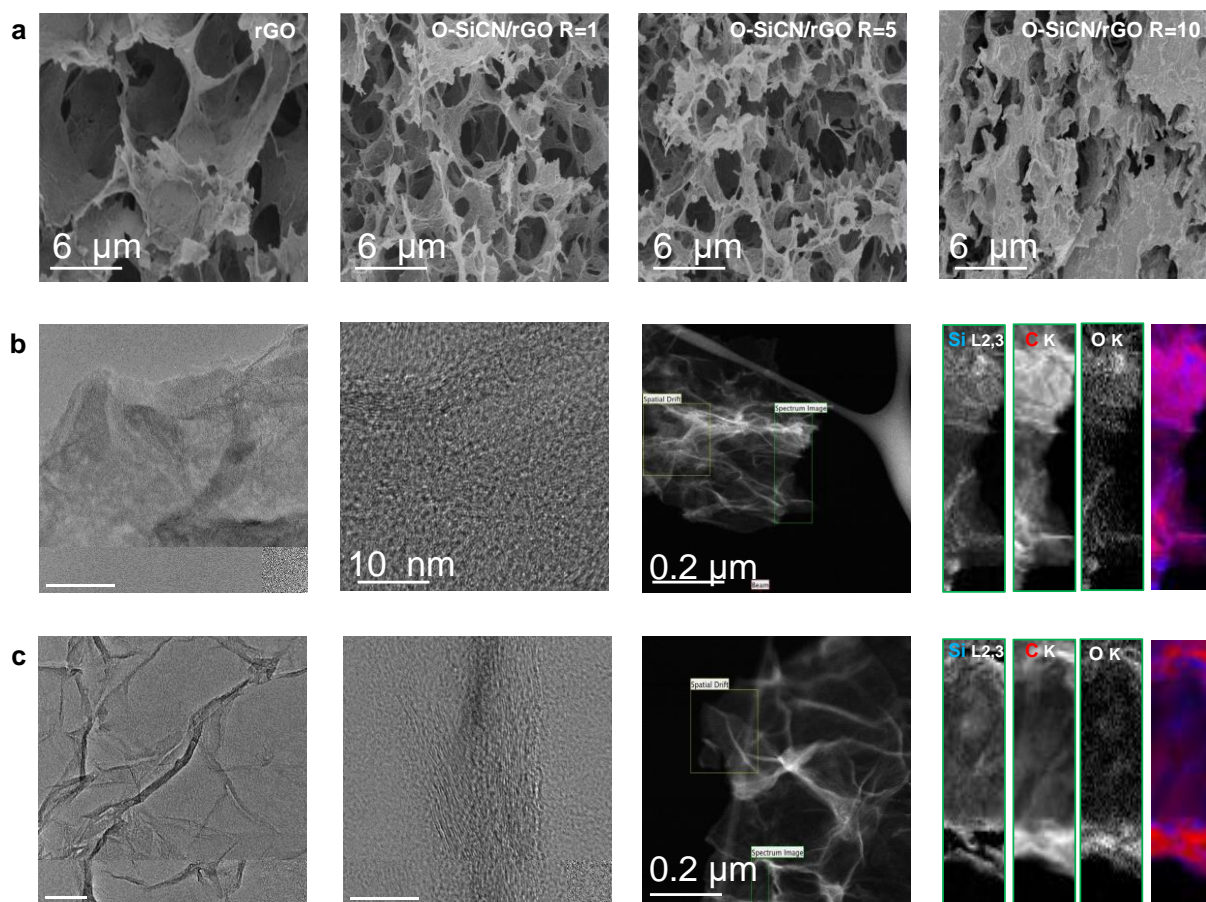

**Figure S3 :** (a) SEM images of rGO foam and O-SiCN/rGO composites at different ratios. (b,c) EELS with chemical maps for respectively O-SiCN/rGO and O-SiC/rGO composites with a 1:1 ratio.

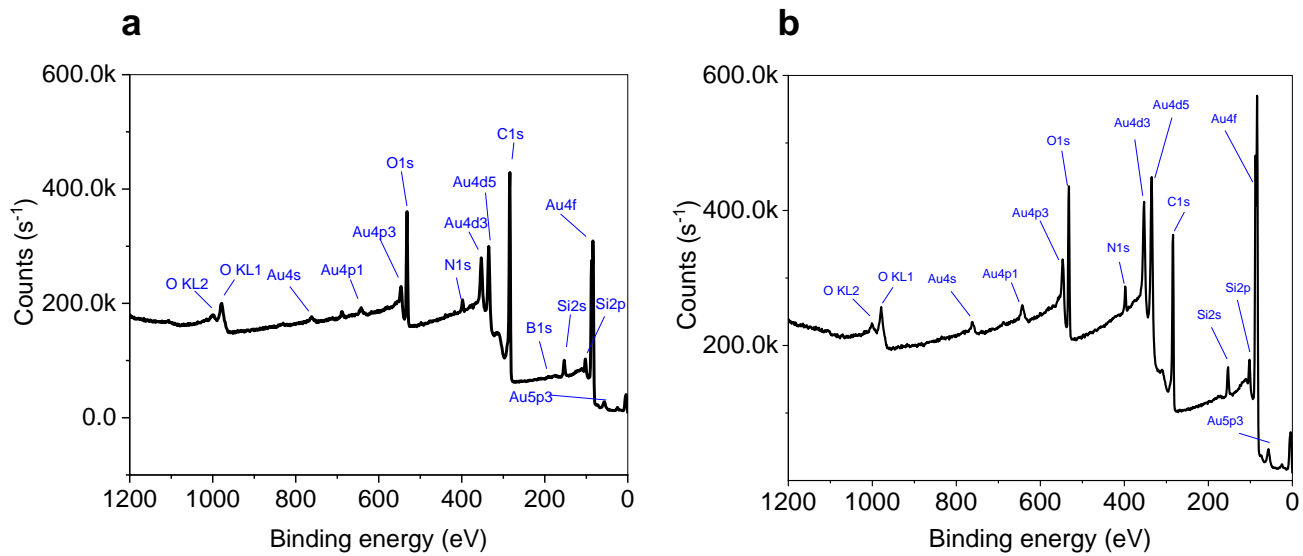

**Figure S4:** XPS survey spectra of (a) O-SiBCN/rGO and (b) O-SiCN/rGO composites. The spectra show that no metallic impurities are detected.

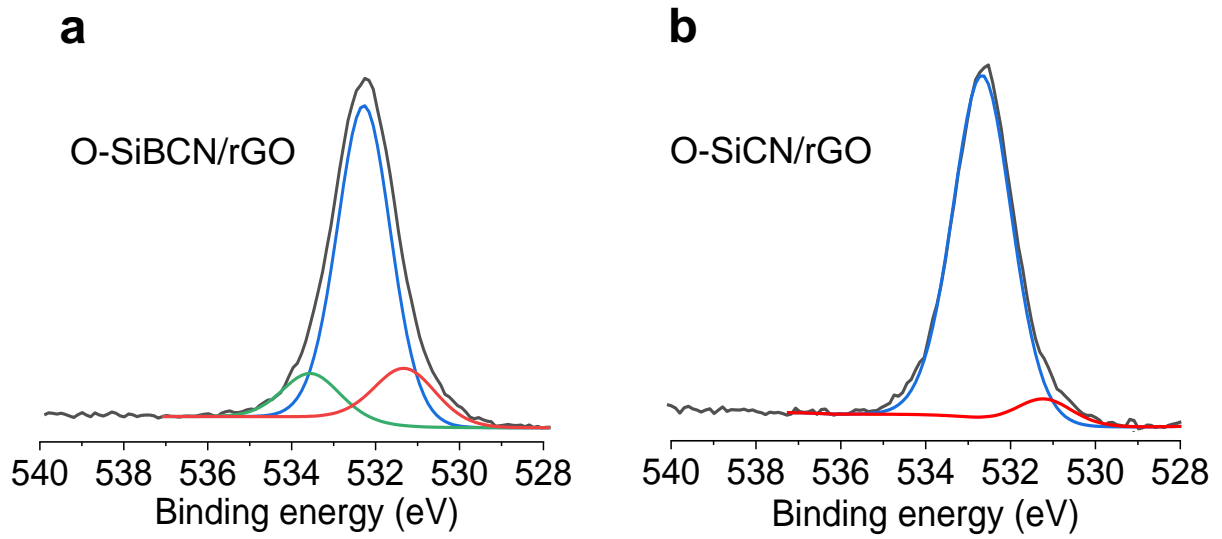

**Figure S5:** XPS spectra of O1s regions of (a) O-SiBCN/rGO and (b) O-SiCN/rGO composites.

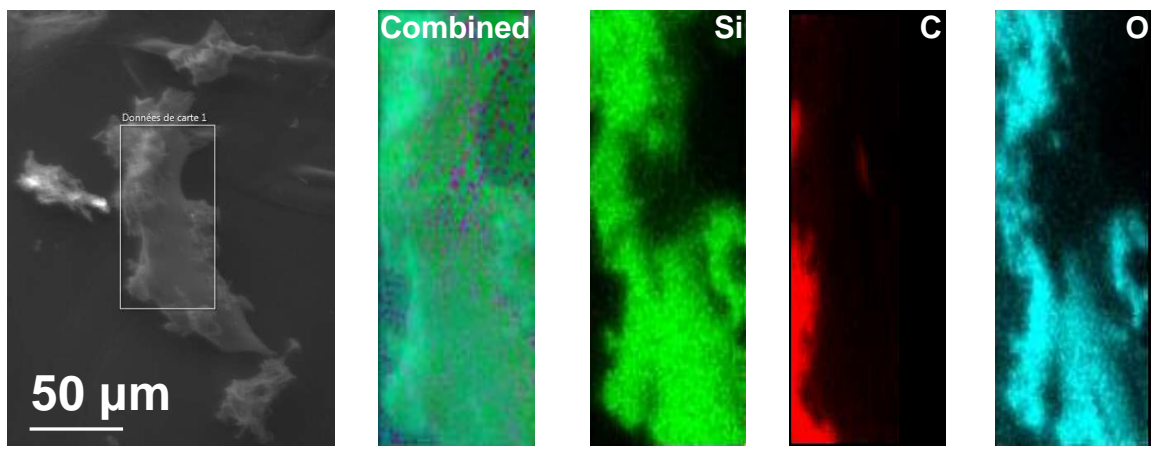

**Figure S6 :** SEM image and chemical maps on the TGA residue of O-SiBCN/rGO composite performed under air at 1000°C. The presence of Si and C elements demonstrates that the ceramic remained after the combustion of rGO.

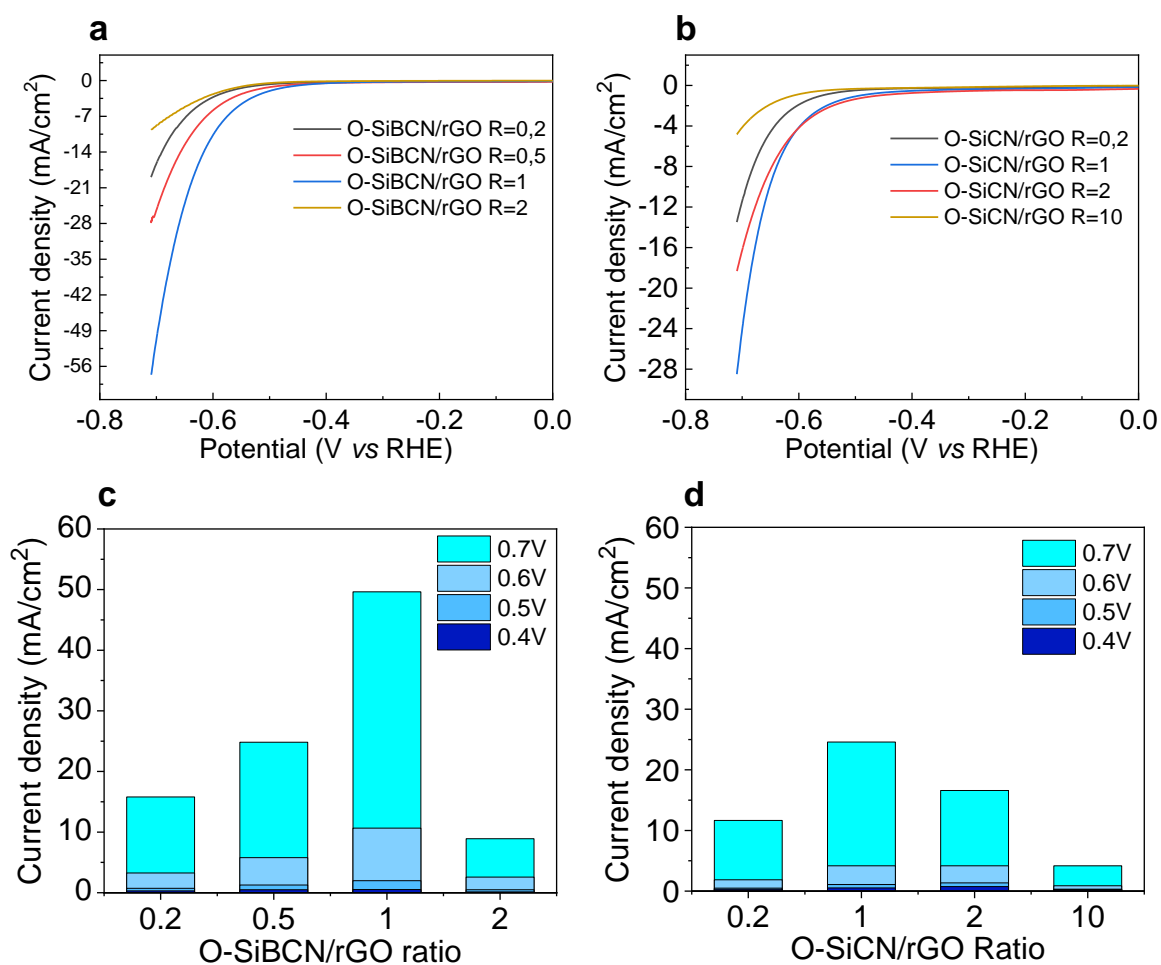

**Figure S7:** (a,b) Polarization curves of O-SiBCN/rGO and O-SiCN/rGO composites at different ratios, (c,d) Histograms representing the evolution of the current density at different potentials for the O-SiBCN/rGO and O-SiCN/rGO composites respectively. For both PDC/rGO systems we found an optimum of the catalytic activity for a PDCs/rGO 1:1 ratio.



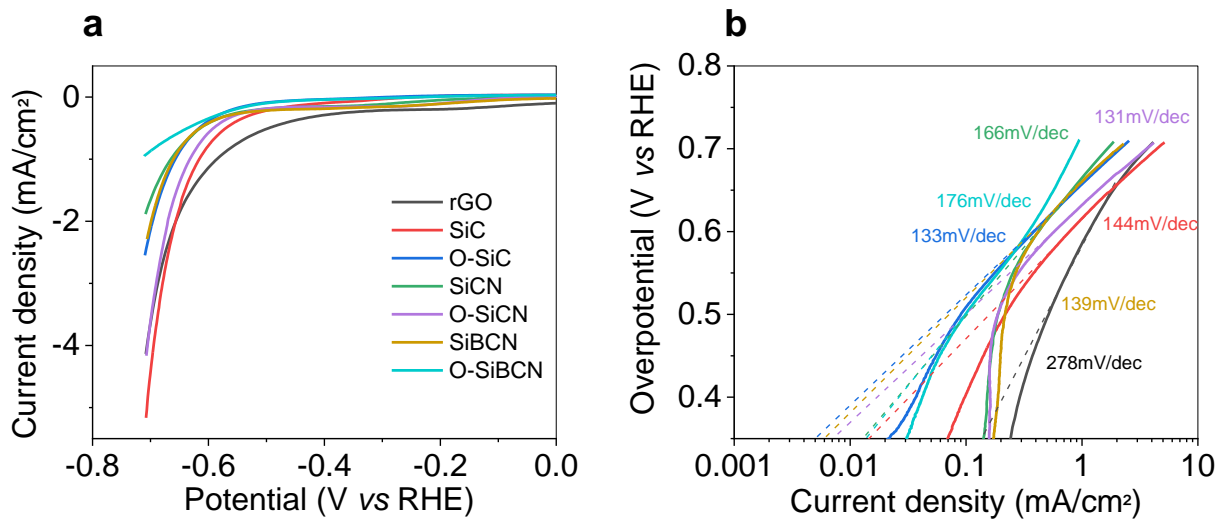

**Figure S8 :** (a) Polarization curves and (b) Tafel slopes of rGO, SiC, O-SiC, SiCN, O-SiCN, SiBCN, O-SiBCN catalysts.
